# Supplementary material
Source: PubMed Central journal article supplement (PMC122157)
Supplement: pnas_032646799_1.pdf [file pnas_032646799_1.pdf]

Supporting information for Papasozomenos and Shanavas (January 22, 2001) *Proc. Natl. Acad. Sci. USA*, 10.1073/pnas.032646799.

**Table 2. Initial rate kinase activities towards recombinant  $\tau$ , bovine  $\tau$ , and selective substrates in forebrain extracts of OVX female rats 0, 3, 6, and 12 h after heat shock with and without replacement therapy with EB or TP or both EB and TP**

<sup>32</sup>P cpm/1  $\mu$ g of  $\tau$  or various amounts of selective substrates \*

| Gonadal hormone treatment kinase | Substrate     | Control          | 0 h                           | 3 h                           | 6 h                           | 12 h                          |
|----------------------------------|---------------|------------------|-------------------------------|-------------------------------|-------------------------------|-------------------------------|
| Sham-OVX + SO                    |               | (n = 3)          | (n = 3)                       | (n = 3)                       | (n = 3)                       | (n = 3)                       |
| GSK-3 $\beta$                    | htau40        | 2167 $\pm$ 249   | 3566 $\pm$ 468                | 4906 $\pm$ 873 <sup>†</sup>   | 5858 $\pm$ 488 <sup>†</sup>   | 2593 $\pm$ 395                |
|                                  | Bovine $\tau$ | 1104 $\pm$ 223   | 2143 $\pm$ 307 <sup>†</sup>   | 2832 $\pm$ 235 <sup>†</sup>   | 2756 $\pm$ 245 <sup>†</sup>   | 1828 $\pm$ 222                |
| Cdk5                             | PGSP-2        | 17528 $\pm$ 2438 | 32911 $\pm$ 3655 <sup>†</sup> | 39041 $\pm$ 2979 <sup>†</sup> | 47006 $\pm$ 5704 <sup>†</sup> | 25406 $\pm$ 5955              |
|                                  | htau40        | 3034 $\pm$ 227   | 2807 $\pm$ 240                | 4168 $\pm$ 269 <sup>†</sup>   | 6238 $\pm$ 820 <sup>†</sup>   | 3831 $\pm$ 380 <sup>†</sup>   |
| JNK                              | Bovine $\tau$ | 1399 $\pm$ 237   | 1058 $\pm$ 157                | 2189 $\pm$ 322 <sup>†</sup>   | 2834 $\pm$ 308 <sup>†</sup>   | 1413 $\pm$ 260                |
|                                  | Histone H1    | 11391 $\pm$ 1774 | 8570 $\pm$ 1264               | 14672 $\pm$ 1633 <sup>†</sup> | 21137 $\pm$ 2738 <sup>†</sup> | 13494 $\pm$ 2239 <sup>†</sup> |
|                                  | htau40        | 2273 $\pm$ 345   | 1517 $\pm$ 243 <sup>†</sup>   | 3886 $\pm$ 501 <sup>†</sup>   | 3764 $\pm$ 547 <sup>†</sup>   | 2422 $\pm$ 222                |
|                                  | Bovine $\tau$ | 1213 $\pm$ 277   | 900 $\pm$ 178                 | 2006 $\pm$ 299 <sup>†</sup>   | 2088 $\pm$ 341 <sup>†</sup>   | 1179 $\pm$ 219                |
|                                  | c-Jun-GST     | 3163 $\pm$ 372   | 2173 $\pm$ 286 <sup>†</sup>   | 6163 $\pm$ 774 <sup>†</sup>   | 5646 $\pm$ 876 <sup>†</sup>   | 4123 $\pm$ 580 <sup>†</sup>   |
| OVX + SO                         |               | (n = 3)          | (n = 3)                       | (n = 3)                       | (n = 3)                       | (n = 3)                       |
| GSK-3 $\beta$                    | htau40        | 2081 $\pm$ 334   | 3312 $\pm$ 545                | 5342 $\pm$ 1133 <sup>†</sup>  | 5431 $\pm$ 1286 <sup>†</sup>  | 3090 $\pm$ 713                |
|                                  | Bovine $\tau$ | 1198 $\pm$ 204   | 2162 $\pm$ 366 <sup>†</sup>   | 2960 $\pm$ 363 <sup>†</sup>   | 2736 $\pm$ 494 <sup>†</sup>   | 1550 $\pm$ 245                |
| Cdk5                             | PGSP-2        | 17738 $\pm$ 2397 | 39325 $\pm$ 2382 <sup>†</sup> | 41351 $\pm$ 4480 <sup>†</sup> | 45794 $\pm$ 8731 <sup>†</sup> | 27205 $\pm$ 4141              |
|                                  | htau40        | 3548 $\pm$ 265   | 3288 $\pm$ 367                | 5369 $\pm$ 360 <sup>†</sup>   | 6282 $\pm$ 942 <sup>†</sup>   | 4011 $\pm$ 484 <sup>†</sup>   |
| JNK                              | Bovine $\tau$ | 1586 $\pm$ 139   | 1324 $\pm$ 228                | 2522 $\pm$ 371 <sup>†</sup>   | 3036 $\pm$ 290 <sup>†</sup>   | 1655 $\pm$ 257                |
|                                  | Histone H1    | 10425 $\pm$ 1482 | 9750 $\pm$ 1231               | 13771 $\pm$ 667 <sup>†</sup>  | 19876 $\pm$ 1113 <sup>†</sup> | 12928 $\pm$ 1123 <sup>†</sup> |
|                                  | htau40        | 2240 $\pm$ 315   | 1760 $\pm$ 330 <sup>†</sup>   | 3080 $\pm$ 255 <sup>†</sup>   | 4086 $\pm$ 581 <sup>†</sup>   | 2776 $\pm$ 599                |
|                                  | Bovine $\tau$ | 1233 $\pm$ 158   | 814 $\pm$ 78                  | 1964 $\pm$ 480 <sup>†</sup>   | 2274 $\pm$ 579 <sup>†</sup>   | 1519 $\pm$ 356                |
|                                  | c-Jun-GST     | 3569 $\pm$ 576   | 2448 $\pm$ 267 <sup>†</sup>   | 6859 $\pm$ 1068 <sup>†</sup>  | 5659 $\pm$ 876 <sup>†</sup>   | 4486 $\pm$ 448 <sup>†</sup>   |
| OVX + EB                         |               | (n = 3)          | (n = 3)                       | (n = 3)                       | (n = 3)                       | (n = 3)                       |
| GSK-3 $\beta$                    | htau40        | 2514 $\pm$ 591   | 4849 $\pm$ 1552 <sup>†</sup>  | 5655 $\pm$ 1229 <sup>†</sup>  | 6814 $\pm$ 1083 <sup>†</sup>  | 3314 $\pm$ 735                |
|                                  | Bovine $\tau$ | 1250 $\pm$ 276   | 2439 $\pm$ 399 <sup>†</sup>   | 2587 $\pm$ 339 <sup>†</sup>   | 3408 $\pm$ 425 <sup>†</sup>   | 2026 $\pm$ 645                |
| Cdk5                             | PGSP-2        | 21857 $\pm$ 4180 | 39277 $\pm$ 3981 <sup>†</sup> | 41420 $\pm$ 4220 <sup>†</sup> | 52461 $\pm$ 8227 <sup>†</sup> | 23580 $\pm$ 4899              |
|                                  | htau40        | 4091 $\pm$ 404   | 4793 $\pm$ 787                | 6945 $\pm$ 606 <sup>†</sup>   | 8317 $\pm$ 945 <sup>†</sup>   | 5651 $\pm$ 461 <sup>†</sup>   |
| JNK                              | Bovine $\tau$ | 1911 $\pm$ 140   | 1623 $\pm$ 156                | 3151 $\pm$ 407 <sup>†</sup>   | 3008 $\pm$ 167 <sup>†</sup>   | 1877 $\pm$ 485                |
|                                  | Histone H1    | 12106 $\pm$ 1023 | 11849 $\pm$ 1184              | 21065 $\pm$ 2223 <sup>†</sup> | 24681 $\pm$ 2645 <sup>†</sup> | 15805 $\pm$ 1706 <sup>†</sup> |
|                                  | htau40        | 2623 $\pm$ 499   | 1737 $\pm$ 516 <sup>†</sup>   | 4093 $\pm$ 598 <sup>†</sup>   | 3624 $\pm$ 672 <sup>†</sup>   | 3059 $\pm$ 532                |
|                                  | Bovine $\tau$ | 1220 $\pm$ 162   | 777 $\pm$ 177                 | 1887 $\pm$ 266 <sup>†</sup>   | 2245 $\pm$ 305 <sup>†</sup>   | 1445 $\pm$ 289                |
|                                  | c-Jun-GST     | 3353 $\pm$ 449   | 2460 $\pm$ 458 <sup>†</sup>   | 6794 $\pm$ 824 <sup>†</sup>   | 5944 $\pm$ 747 <sup>†</sup>   | 4276 $\pm$ 464 <sup>†</sup>   |
| OVX + TP                         |               | (n = 3)          | (n = 3)                       | (n = 3)                       | (n = 3)                       | (n = 3)                       |
| GSK-3 $\beta$                    | htau40        | 2128 $\pm$ 584   | 2851 $\pm$ 482                | 1962 $\pm$ 479                | 1995 $\pm$ 369                | 2129 $\pm$ 326                |
|                                  | Bovine $\tau$ | 1185 $\pm$ 268   | 1620 $\pm$ 151                | 1146 $\pm$ 206                | 1200 $\pm$ 166                | 1326 $\pm$ 431                |
| Cdk5                             | PGSP-2        | 15922 $\pm$ 2783 | 22639 $\pm$ 3206              | 12984 $\pm$ 3025              | 12877 $\pm$ 1644              | 14395 $\pm$ 1467              |
|                                  | htau40        | 3835 $\pm$ 634   | 3339 $\pm$ 550                | 6472 $\pm$ 567 <sup>†</sup>   | 7461 $\pm$ 1373 <sup>†</sup>  | 4338 $\pm$ 1006 <sup>†</sup>  |
| JNK                              | Bovine $\tau$ | 1564 $\pm$ 189   | 1567 $\pm$ 251                | 2702 $\pm$ 265 <sup>†</sup>   | 3149 $\pm$ 275 <sup>†</sup>   | 2222 $\pm$ 374                |
|                                  | Histone H1    | 10619 $\pm$ 1729 | 11518 $\pm$ 2179              | 16959 $\pm$ 3224 <sup>†</sup> | 18556 $\pm$ 1508 <sup>†</sup> | 11997 $\pm$ 2795 <sup>†</sup> |
|                                  | htau40        | 2522 $\pm$ 478   | 1468 $\pm$ 353 <sup>†</sup>   | 3870 $\pm$ 800 <sup>†</sup>   | 4240 $\pm$ 872 <sup>†</sup>   | 3389 $\pm$ 608                |
|                                  | Bovine $\tau$ | 1075 $\pm$ 194   | 724 $\pm$ 166                 | 2197 $\pm$ 506 <sup>†</sup>   | 1829 $\pm$ 394 <sup>†</sup>   | 1283 $\pm$ 256                |
|                                  | c-Jun-GST     | 3447 $\pm$ 428   | 2737 $\pm$ 467 <sup>†</sup>   | 6326 $\pm$ 498 <sup>†</sup>   | 7170 $\pm$ 1228 <sup>†</sup>  | 4656 $\pm$ 572 <sup>†</sup>   |
| OVX + (EB + TP)                  |               | (n = 3)          | (n = 3)                       | (n = 3)                       | (n = 3)                       | (n = 3)                       |
| GSK-3 $\beta$                    | htau40        | 1955 $\pm$ 407   | 2587 $\pm$ 311                | 1932 $\pm$ 366                | 1889 $\pm$ 431                | 1971 $\pm$ 371                |

|      |               |                  |                             |                               |                               |                               |
|------|---------------|------------------|-----------------------------|-------------------------------|-------------------------------|-------------------------------|
|      | Bovine $\tau$ | 1253 $\pm$ 322   | 1645 $\pm$ 252              | 1032 $\pm$ 1221               | 992 $\pm$ 195                 | 1195 $\pm$ 65                 |
| Cdk5 | PGSP-2        | 12608 $\pm$ 2697 | 19896 $\pm$ 4190            | 12213 $\pm$ 2479              | 11179 $\pm$ 2878              | 13403 $\pm$ 2016              |
|      | htau40        | 3606 $\pm$ 425   | 3539 $\pm$ 510              | 5988 $\pm$ 770 <sup>†</sup>   | 6246 $\pm$ 1161 <sup>†</sup>  | 4768 $\pm$ 860 <sup>†</sup>   |
|      | Bovine $\tau$ | 1774 $\pm$ 257   | 1731 $\pm$ 212              | 3180 $\pm$ 380 <sup>†</sup>   | 3418 $\pm$ 372 <sup>†</sup>   | 1797 $\pm$ 199                |
| JNK  | Histone H1    | 10670 $\pm$ 2568 | 9658 $\pm$ 613              | 18694 $\pm$ 1670 <sup>†</sup> | 17637 $\pm$ 2904 <sup>†</sup> | 13688 $\pm$ 2489 <sup>†</sup> |
|      | htau40        | 2529 $\pm$ 487   | 1728 $\pm$ 340 <sup>†</sup> | 4412 $\pm$ 842 <sup>†</sup>   | 3754 $\pm$ 523 <sup>†</sup>   | 3038 $\pm$ 486                |
|      | Bovine $\tau$ | 1078 $\pm$ 263   | 817 $\pm$ 119               | 2017 $\pm$ 307 <sup>†</sup>   | 1909 $\pm$ 455 <sup>†</sup>   | 1321 $\pm$ 241                |
|      | c-Jun-GST     | 4388 $\pm$ 666   | 2483 $\pm$ 467 <sup>†</sup> | 6710 $\pm$ 612 <sup>†</sup>   | 6912 $\pm$ 1093 <sup>†</sup>  | 4311 $\pm$ 1168 <sup>†</sup>  |

\*, PGSP-2, 3.79  $\mu$ g; histone H1 and c-Jun-GST, 1  $\mu$ g each. *n*, number of rats (total, *n* = 75).

<sup>†</sup>, *P* < 0.05 in comparison with respective controls (Tukey test). Data are means  $\pm$  SD.
