# Supplementary material
Source: PubMed Central journal article supplement (PMC122157)
Supplement: pnas_032646799_2.pdf [file pnas_032646799_2.pdf]

Supporting information for Papasozomenos and Shanavas (January 22, 2001) *Proc. Natl. Acad. Sci. USA*, 10.1073/pnas.032646799.

**Table 3. Quantitative immunoblot analysis of the relative total amounts of GSK-3 $\beta$ , Cdk-5, and JNK in forebrain extracts from the five gonadal hormone treated-groups**

<sup>125</sup>I-labeled protein A, cpm  $\times$  10<sup>-3</sup>/50  $\mu$ g of extract protein

| Gonadal hormone treatment | GSK-3 $\beta$ *                 | Cdk-5 <sup>†</sup>             | JNK <sup>‡</sup>               |
|---------------------------|---------------------------------|--------------------------------|--------------------------------|
| Sham-OVX + SO             | 16.7 $\pm$ 1.8 ( <i>n</i> = 15) | 1.2 $\pm$ 0.2 ( <i>n</i> = 14) | 1.1 $\pm$ 0.1 ( <i>n</i> = 15) |
| OVX + SO                  | 16.2 $\pm$ 0.9 ( <i>n</i> = 14) | 1.2 $\pm$ 0.2 ( <i>n</i> = 13) | 1.0 $\pm$ 0.1 ( <i>n</i> = 14) |
| OVX + EB                  | 15.6 $\pm$ 1.6 ( <i>n</i> = 15) | 1.1 $\pm$ 0.2 ( <i>n</i> = 15) | 1.1 $\pm$ 0.1 ( <i>n</i> = 15) |
| OVX + TP                  | 15.2 $\pm$ 1.3 ( <i>n</i> = 15) | 1.0 $\pm$ 0.2 ( <i>n</i> = 15) | 1.2 $\pm$ 0.2 ( <i>n</i> = 14) |
| OVX + (EB + TP)           | 15.7 $\pm$ 1.2 ( <i>n</i> = 15) | 1.1 $\pm$ 0.1 ( <i>n</i> = 15) | 1.1 $\pm$ 0.2 ( <i>n</i> = 15) |

After SDS/10% PAGE, the electroplotted proteins were incubated successively with primary Abs against GSK-3 $\beta$ , or Cdk-5, or JNK and <sup>125</sup>I-labeled protein A (type NEX-146L, Dupont/NEN). The individual bands were counted in a  $\gamma$  counter. The data were analyzed with one-way ANOVA. Data are means  $\pm$  SD. *n* = number of rats.

\* ,  $F = 2.432$ ,  $df = 4, 73$ ,  $P > 0.05$ .

<sup>†</sup> ,  $F = 2.320$ ,  $df = 4, 71$ ,  $P > 0.05$ .

<sup>‡</sup> ,  $F = 2.175$ ,  $df = 4, 72$ ,  $P > 0.05$ . However, the powers of the performed tests with  $\alpha = 0.05$  were below the desired power of 0.800; i.e., \* = 0.415, <sup>†</sup> = 0.383, and <sup>‡</sup> = 0.342.
